# Supplementary material for: Once-weekly risedronate for prevention of hip fracture in women with Parkinson's disease: a randomised controlled trial
Source: HighWire-hosted journal article supplement (doi:10.1136/jnnp.2011.244574), 2011-08-08
Supplement: Expression_of_concern.82.1390.pdf [file Expression_of_concern.82.1390.pdf]

**Expression of concern**

Sato Y, Iwamoto J, Honda Y. Once-weekly risedronate for prevention of hip fracture in women with Parkinson's disease: a randomised controlled trial. *J Neurol Neurosurg Psychiatry* 2011;**82**:1390-1393.

It has been brought to the attention of the Editors that the authors for this article may not have met the criteria of authorship. The issue is under further investigation.
